# Supplementary material for: Conductive natural fibers as dual-functional conductive agents: high conductivity and stress relief in silicon-based anodes
Source: Royal Society of Chemistry journal article supplement (doi:10.1039/d5ta08815a), 2026-01-01
Supplement: d5ta08815a1.pdf [file d5ta08815a1.pdf]

## Supporting information

# Conductive Natural Fibers as Dual-Functional Conductive Agent: High Conductivity and Stress Relief in Silicon-Based Anodes

Yiting Xiao<sup>1</sup>, Fan Yang<sup>1</sup>, Siying Li<sup>1</sup>, Xingyu Sun<sup>1</sup>, Siyu Jian<sup>1</sup>, Dan Qian<sup>1</sup>, Xingyu Xia<sup>1</sup>, Siyu Li<sup>1</sup>, Chuhan Zhou<sup>1</sup>, Yangtian Lu<sup>3</sup>, Ziwei Wang<sup>3</sup>, Min Ling<sup>1,\*</sup>, Bin Wang<sup>2,\*</sup>, Chengdu Liang<sup>1,\*</sup> and Xianbo Yu<sup>4,\*</sup>

<sup>1</sup>Zhejiang Provincial Key Laboratory of Advanced Chemical Engineering Manufacture Technology, College of Chemical and Biological Engineering, Zhejiang University, Hangzhou, 310027, China

<sup>2</sup>Minmetals Exploration & Development CO. LTD, Beijing, 100010, China

<sup>3</sup>Zhejiang Research Institute of Chemical Industry Co., LTD, Hangzhou, Zhejiang, 310023, China

<sup>4</sup>Sinochem Lantian Fluoro Materials Co., Ltd, Hangzhou, Zhejiang, 310052, China

**Corresponding Authors:** E-mail: minling@zju.edu.cn, wangbin0502@163.com, cdliang@zju.edu.cn, yuxianbo@sinochem.com

### Graphical Abstract:

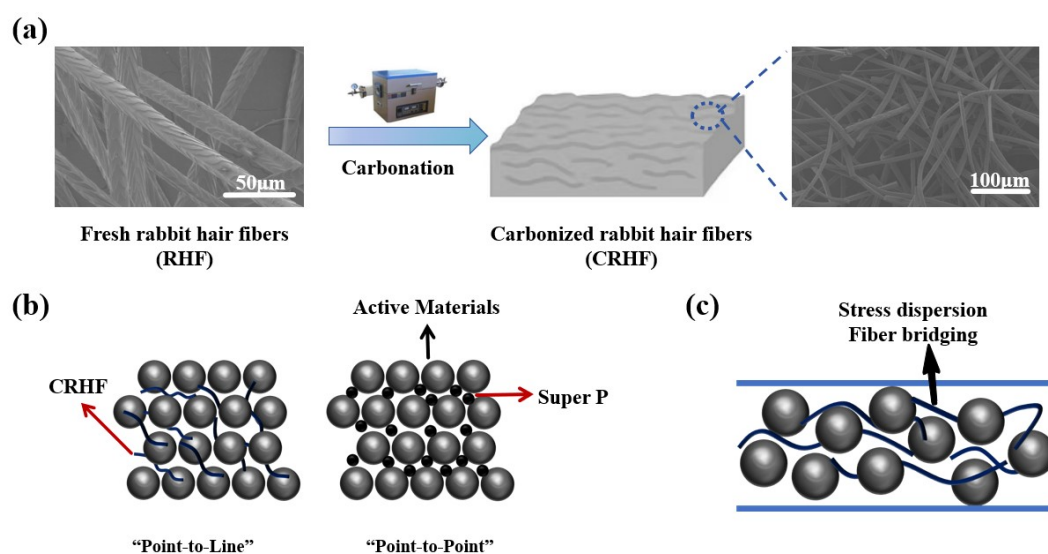

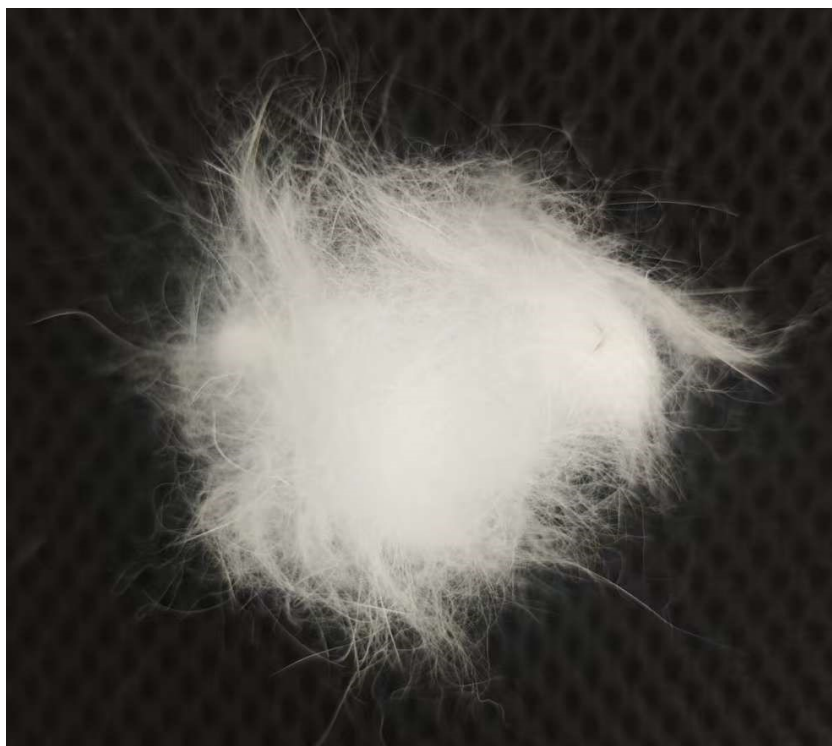

Fig. S1. The physical image of RHF.

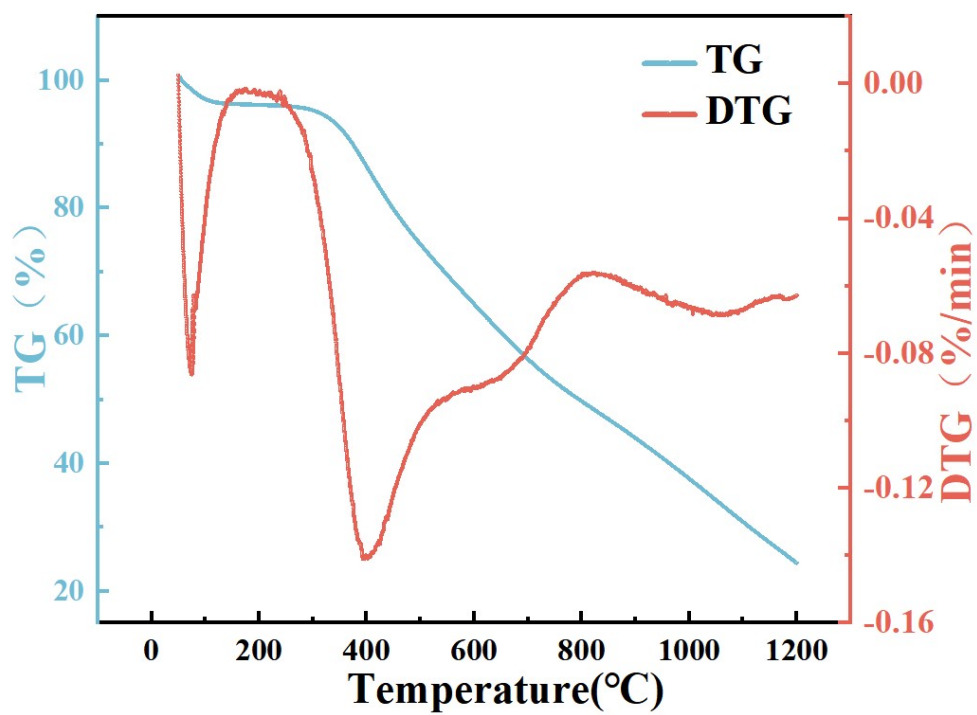

Fig. S2. TG/DTG image of CRHF

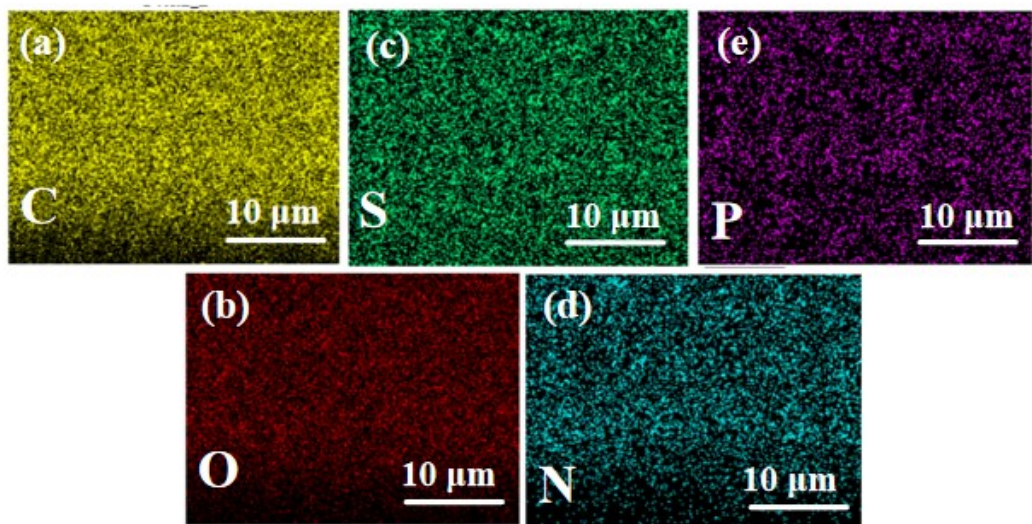

Fig. S3. EDS Mapping results of RHF (C; S; P; O; N).

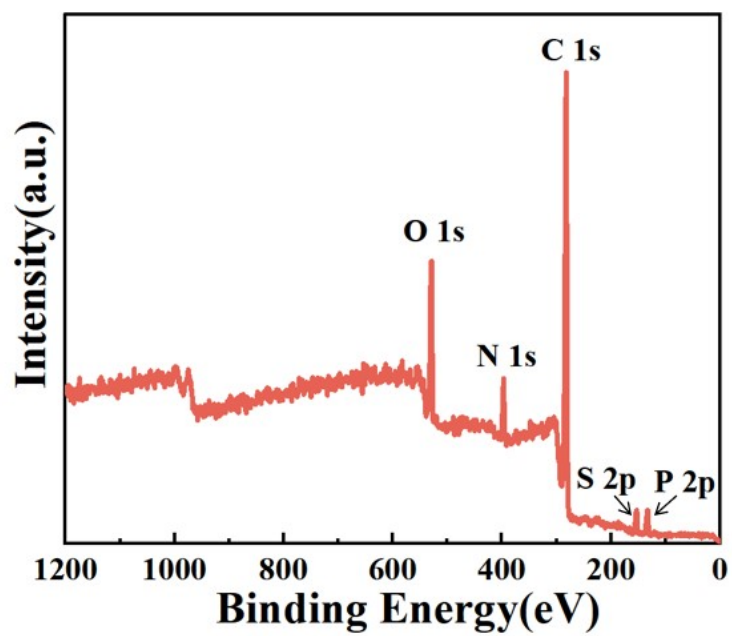

Fig. S4. Survey spectra of the RHF.

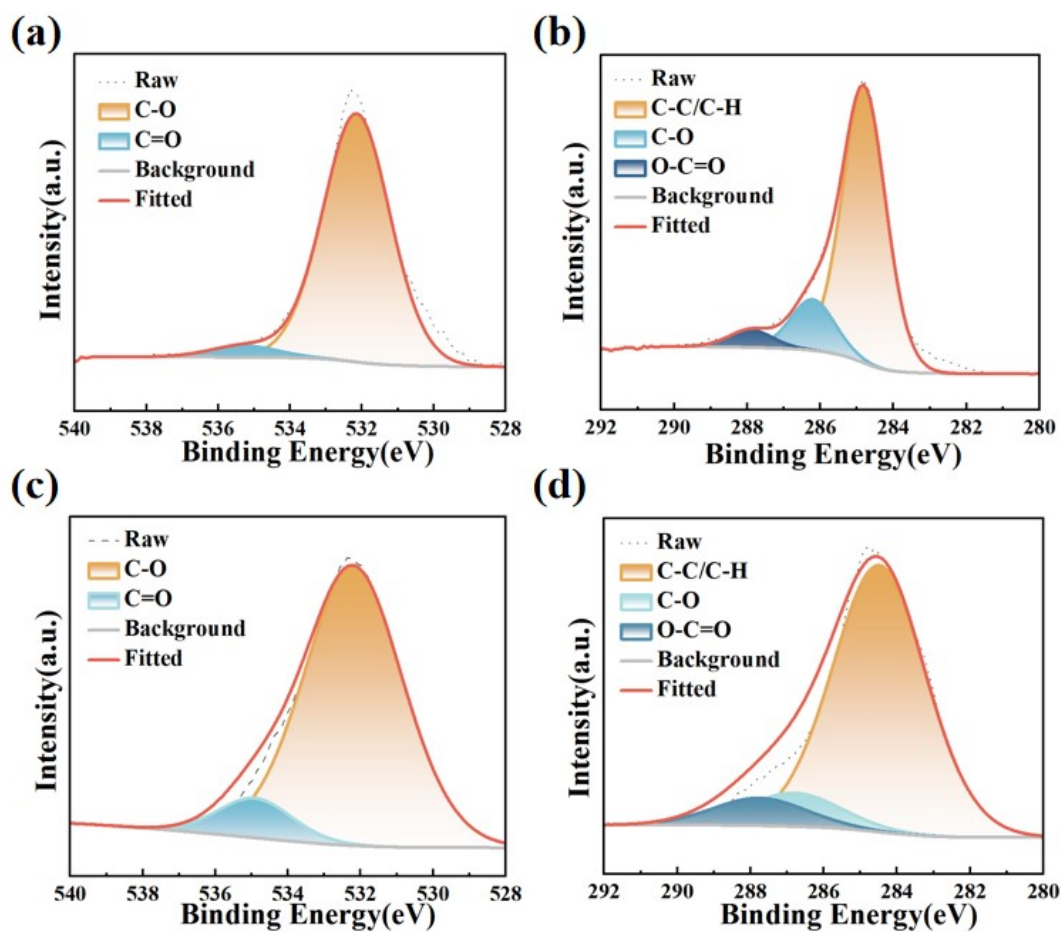

Fig. S5. (a) O 1s and (b) C 1s XPS spectrum of CRHF-800; (c) O 1s and (d) C 1s XPS spectrum of RHF.

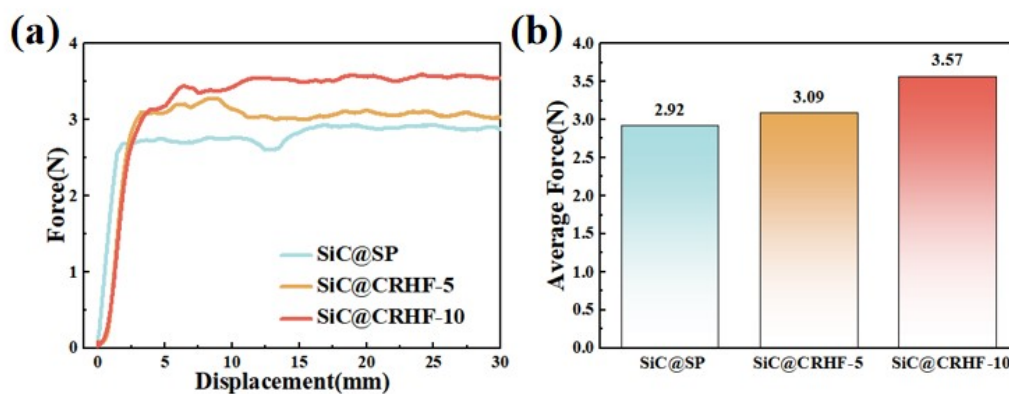

Fig. S6. (a) 180° peeling test of different SiC electrodes; (b) average peeling force of different SiC Electrodes.

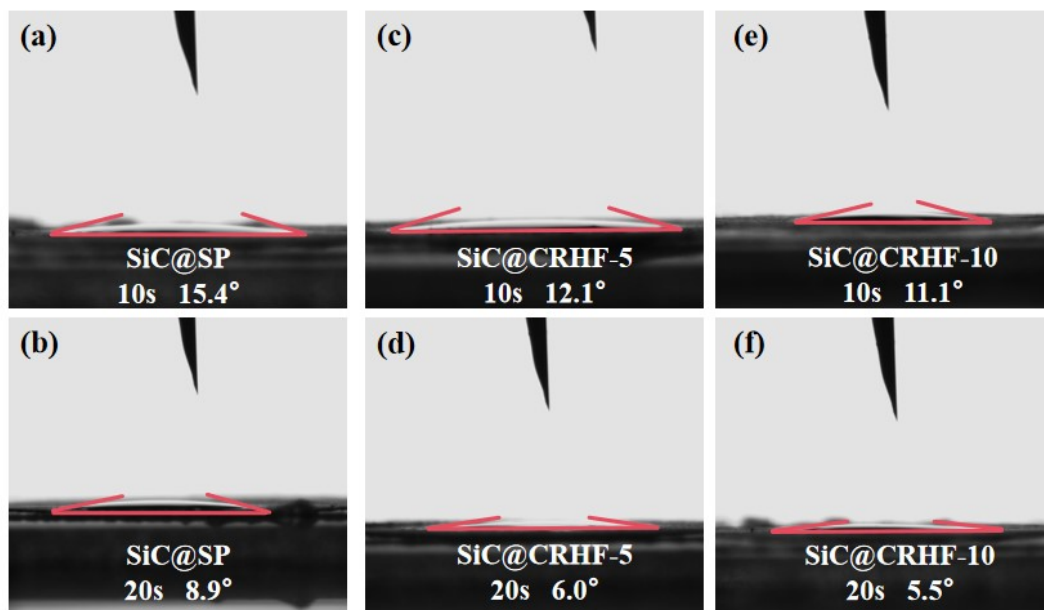

Fig. S7. The contact angle of different SiC electrodes to the electrolyte at 10 s and 20 s

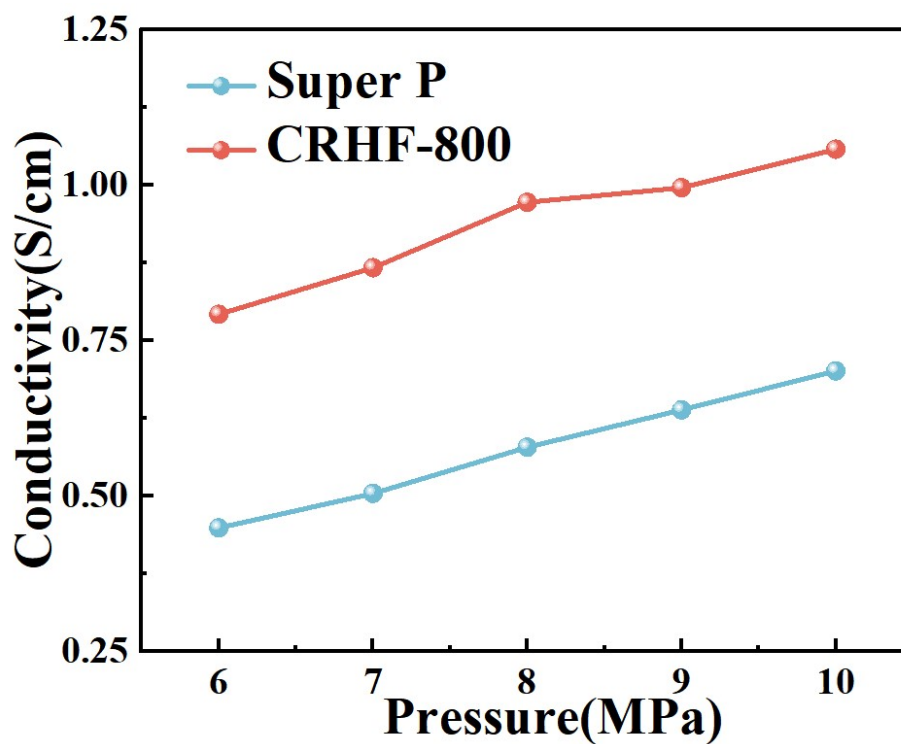

Fig. S8. Conductivity of the Super P and CRHF-800 under different pressure.



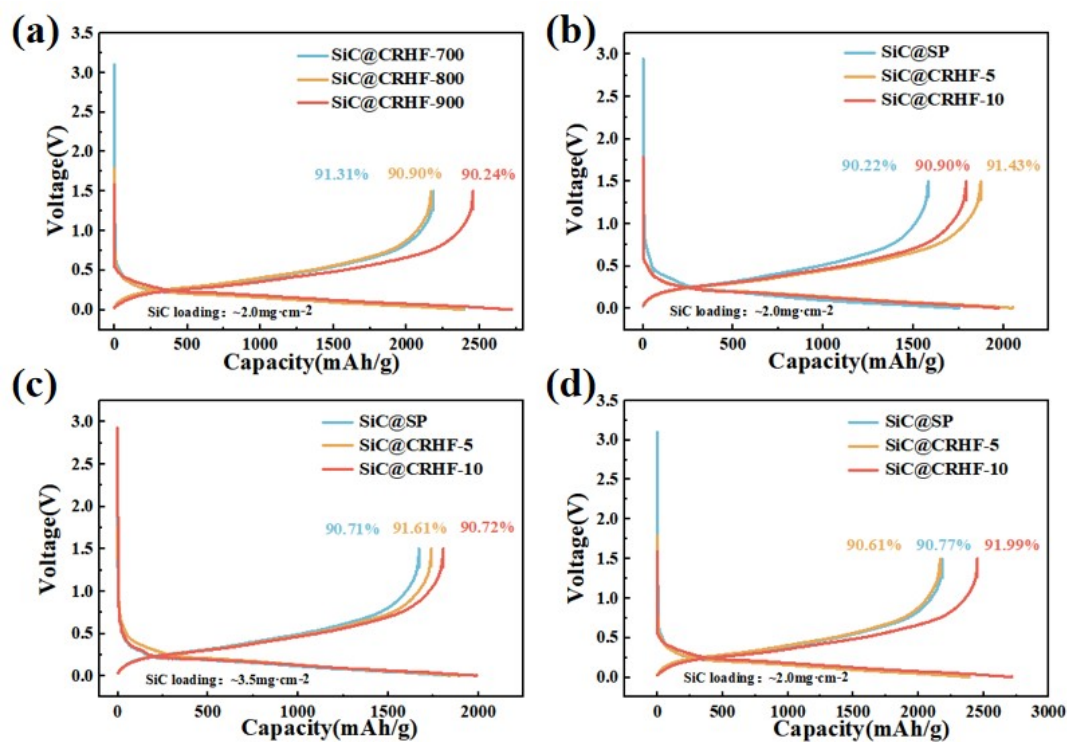

Fig. S9. Initial charge-discharge curves of the (a) SiC@CRHF-700, SiC@CRHF-800 and SiC@CRHF-900 at 0.3 C; (b) Cycling performances of the various SiC electrodes at 0.3 C; (c) High-loading SiC electrodes at 0.3 C; (d) Cycling performances of the various SiC electrodes at 0.5 C.

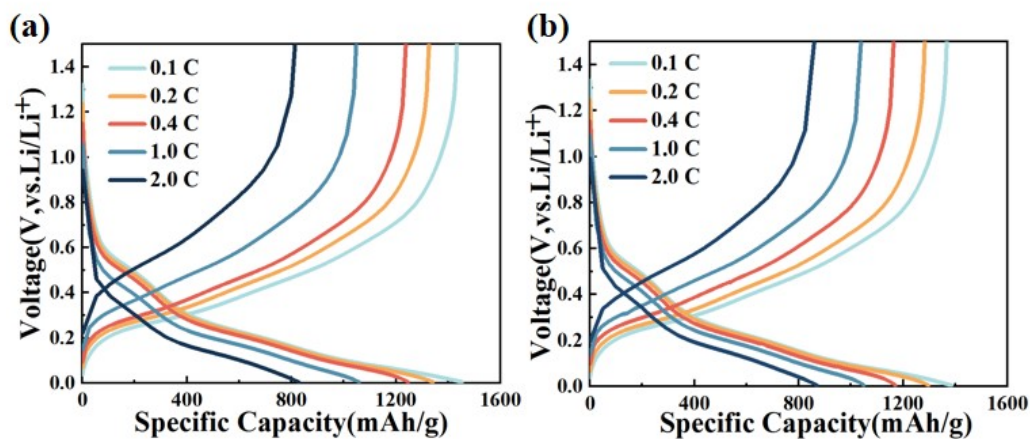

Fig. S10. GCD plots of the rate cycling of (a) SiC@SP electrode and (b) SiC@CRHF-5 electrode.

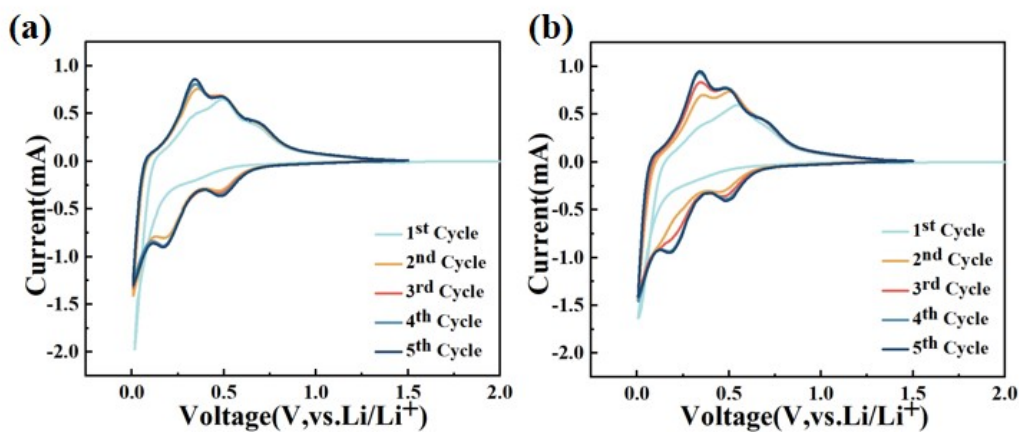

Fig. S11. CV curves of (a) SiC@SP electrode and (b) SiC@CRHF-5 electrode.

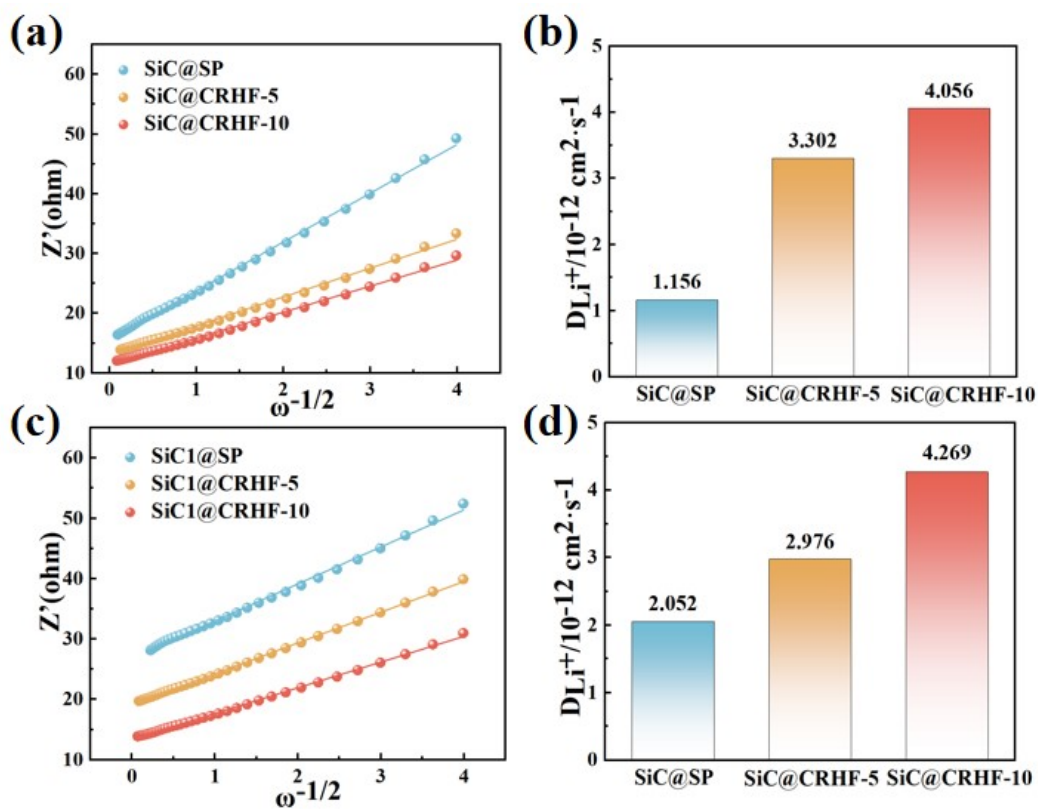

Fig. S12. (a) Various SiC electrodes Warburg impedance plot after 20 cycles at 0.3 C; (b)  $D_{Li^+}$  calculated from fitting results of (a); (c) Various SiC electrodes Warburg impedance plot after 30 cycles at 0.3 C; (d)  $D_{Li^+}$  calculated from fitting results of (c);

Table S1 Weight percentages of elements of RHF and CRHF

| 元素 \ wt% | RHF   | CRHF  |
|----------|-------|-------|
| C        | 47.80 | 80.90 |
| N        | 19.34 | 10.61 |
| O        | 29.41 | 6.59  |
| P        | 0.16  | 0.31  |
| S        | 3.29  | 1.59  |

Table S2 Quantitative XPS analysis of  $\text{Li}_2\text{CO}_3$ ,  $\text{ROCO}_2\text{Li}$ , and LiF fractions of different SiC electrodes before and after cycling

| Component \ Typology | C 1s                                                     | O 1s                     |                          | LiF  |
|----------------------|----------------------------------------------------------|--------------------------|--------------------------|------|
|                      | C=O, $\text{Li}_2\text{CO}_3$ , $\text{ROCO}_2\text{Li}$ | $\text{Li}_2\text{CO}_3$ | $\text{ROCO}_2\text{Li}$ |      |
| SiC@SP               | 17885                                                    | 29940                    | 66117                    | 303  |
| SiC@CRHF-5           | 17009                                                    | 28473                    | 104652                   | 677  |
| SiC@CRHF-10          | 11082                                                    | 21246                    | 114231                   | 1051 |
